# Supplementary material for: Inducible Knockdown of Plasmodium Gene Expression Using the glmS Ribozyme
Source: PLoS One. 2013 Aug 30;8(8):e73783. doi: 10.1371/journal.pone.0073783 (PMC3758297; doi:10.1371/journal.pone.0073783)
Supplement: Table S2 — Genes significantly down-regulated in wild-type 3D7 P. falciparum following treatment with 10 mM GlcN for 24 h. (XLSX) [file pone.0073783.s005.xlsx]

## Sheet: Sheet1
Gene ID	[Product Description]	log2 (GlcN treated:untreated) 3D7 wild-type	uncorrected P-value	FDR adj. P-value
PF3D7_0830400	conserved Plasmodium protein, unknown function	-0.973079	2.84618e-12	9.368e-10
PF3D7_0932000	conserved Plasmodium protein, unknown function	-0.843114	1.24447e-09	1.59292e-07
PF3D7_0909500	subpellicular microtubule protein 1, putative (SPM1)	-0.886484	5.27089e-08	4.18763e-06
PF3D7_1110500	vacuolar sorting protein 35, putative	-0.937635	1.70698e-07	1.06294e-05
PF3D7_1230700	protein transport protein Sec13, putative	-0.555011	7.10155e-06	0.000287052
PF3D7_1337100	protein kinase 6 (PK6)	-1.46051	8.40119e-06	0.000322606
PF3D7_1356300	ubiquitin conjugating enzyme, putative	-0.806546	9.57003e-06	0.000361465
PF3D7_0308800	conserved protein, unknown function	-0.684289	2.00812e-05	0.000701017
PF3D7_1222700	glideosome-associated protein 45 (GAP45)	-0.555661	2.14182e-05	0.000725698
PF3D7_1218300	adaptor protein subunit, putative	-0.70871	3.36087e-05	0.00106075
PF3D7_0721800	conserved Plasmodium protein, unknown function	-0.632011	3.45948e-05	0.00107712
PF3D7_0320900	histone H2A variant, putative (H2A.Z)	-0.532731	4.97153e-05	0.00144483
PF3D7_0814000	60S ribosomal protein L13-2, putative	-0.503341	7.4693e-05	0.00200108
PF3D7_0828700	conserved Plasmodium protein, unknown function	-0.779281	8.2836e-05	0.00214443
PF3D7_1348500	TBC domain protein, putative	-0.566023	9.01408e-05	0.00228224
PF3D7_0218000	replication factor C, subunit 2, putative	-0.70042	0.000114573	0.00283846
PF3D7_1117400	conserved Plasmodium protein, unknown function	-0.51991	0.000148129	0.00337909
PF3D7_1410400	rhoptry-associated protein 1 (RAP1)	-0.524807	0.000166967	0.00367709
PF3D7_0515300	phosphatidylinositol 3-kinase (PI3K)	-0.505651	0.000187375	0.00403469
PF3D7_1355100	minchromosome maintenance (MCM) complex subunit (MCM6)	-0.556478	0.000200523	0.00420005
PF3D7_1231100	Rab GTPase 2 (RAB2)	-0.857145	0.000212975	0.00438121
PF3D7_1129900	transporter, putative	-0.591767	0.00025273	0.00501198
PF3D7_0913800	conserved Plasmodium protein, unknown function	-0.608013	0.000254515	0.00501198
PF3D7_0616100	conserved Plasmodium protein, unknown function	-0.60637	0.000369421	0.00692136
PF3D7_0400200	erythrocyte membrane protein 1, EMP1, exon 2	-0.465763	0.000379746	0.00699948
PF3D7_0722200	rhoptry-associated leucine zipper-like protein 1 (RALP1)	-0.452803	0.000456824	0.00822283
PF3D7_0715900	zinc transporter, putative	-0.546544	0.000468078	0.00824425
PF3D7_1462800	glyceraldehyde-3-phosphate dehydrogenase (GAPDH)	-0.446759	0.000468749	0.00824425
PF3D7_1124900	60S ribosomal protein L35, putative	-0.47795	0.000493879	0.00861082
PF3D7_1200100	erythrocyte membrane protein 1, PfEMP1 (VAR)	-0.50504	0.00051665	0.0088833
PF3D7_0930300	merozoite surface protein 1 (MSP1)	-0.425977	0.000522652	0.00891993
PF3D7_1337400	conserved Plasmodium protein, unknown function	-0.516151	0.000688612	0.0114141
PF3D7_1224000	GTP cyclohydrolase I (GTP-CH)	-0.584202	0.000911383	0.0138806
PF3D7_1013800	conserved Plasmodium protein, unknown function	-0.459501	0.000915731	0.0138806
PF3D7_1320600	Rab GTPase 11a (RAB11a)	-0.525553	0.000930557	0.0140131
PF3D7_0303500	spindle pole body protein, putative	-0.436176	0.000959656	0.014064
PF3D7_1106200	conserved Plasmodium protein, unknown function	-1.26938	0.000964188	0.014064
PF3D7_1038000	antigen UB05	-0.486222	0.00102476	0.0148494
PF3D7_1118100	clathrin assembly protein AP19, putative	-0.709141	0.0010376	0.0149414
PF3D7_1041100	rifin (RIF)	-0.533335	0.00116325	0.0162433
PF3D7_1366100	conserved Plasmodium protein, unknown function	-0.926562	0.00121822	0.0168071
PF3D7_1026800	40S ribosomal protein S2B, putative	-0.410198	0.00123696	0.0169207
PF3D7_1002400	RNA binding protein, putative	-0.432245	0.00127957	0.0172405
PF3D7_1252700	Plasmodium exported protein (PHISTb), unknown function	-0.42836	0.00136176	0.0179865
PF3D7_1331300	signal peptidase 21 kDa subunit (SP21)	-0.568077	0.00147477	0.0188956
PF3D7_1410600	eukaryotic translation initiation factor 2 gamma subunit, putative	-0.420145	0.00150531	0.0191615
PF3D7_1455300	conserved Plasmodium protein, unknown function	-0.447077	0.00193132	0.0237955
PF3D7_1223700	integral membrane protein, putative	-0.515542	0.00202173	0.0245162
PF3D7_1027200	mitochondrial ribosomal protein S22 precursor, putative	-0.451492	0.00207383	0.0248859
PF3D7_1135600	conserved Plasmodium protein, unknown function	-0.441918	0.00213839	0.0253962
PF3D7_1102700	early transcribed membrane protein 11.1 (ETRAMP11.1)	-0.810819	0.00221984	0.0262282
PF3D7_1132000	ubiquitin-like protein, putative	-0.454673	0.00226898	0.0266721
PF3D7_1246200	actin I (ACT1)	-0.396964	0.00232838	0.0268449
PF3D7_1224300	polyadenylate-binding protein, putative (PABP)	-0.378831	0.00237594	0.0272347
PF3D7_1107000	U6 snRNA-associated Sm-like protein LSm4, putative (LSM4)	-0.450445	0.00246952	0.027891
PF3D7_0306600	conserved Plasmodium protein, unknown function	-0.616698	0.00256094	0.0282316
PF3D7_1112400	conserved Plasmodium protein, unknown function	-0.93641	0.00273859	0.029623
PF3D7_1123300	conserved Plasmodium protein, unknown function	-0.582974	0.00278889	0.030003
PF3D7_0731600	acyl-coA synthetase, PfACS5 (ACS5)	-0.403503	0.00279976	0.030003
PF3D7_1206500	Tat binding protein 1(TBP-1)-interacting protein, putative	-1.17736	0.00281845	0.0300634
PF3D7_1308000	conserved Plasmodium membrane protein, unknown function	-0.394508	0.00292069	0.0308682
PF3D7_1140400	conserved Plasmodium protein, unknown function	-0.422514	0.00298988	0.0314552
PF3D7_1009400	zinc finger protein, putative	-0.394284	0.00318515	0.0327616
PF3D7_0624500	anaphase promoting complex subunit, putative	-0.437272	0.00325218	0.0333023
PF3D7_1227900	RNA pseudouridylate synthase, putative	-0.868714	0.00336756	0.0338007
PF3D7_0110000	conserved Plasmodium protein, unknown function	-0.461435	0.00352493	0.0347195
PF3D7_1235000	conserved Plasmodium protein, unknown function	-0.65542	0.00355484	0.0348526
PF3D7_1468200	conserved protein, unknown function	-0.458762	0.0037189	0.0360015
PF3D7_0821800	secretory complex protein 61 beta subunit (Sec61-beta)	-1.0799	0.00406706	0.038602
PF3D7_1208900	conserved Plasmodium protein, unknown function	-0.394864	0.00421132	0.0396036
PF3D7_0820700	2-oxoglutarate dehydrogenase E1 component	-0.400914	0.00432902	0.0405449
PF3D7_1431600	ATP-specific succinyl-CoA synthetase beta subunit, putative	-0.451995	0.00439113	0.040908
PF3D7_1211800	polyubiquitin (PfpUB)	-0.417157	0.00496582	0.0452906
PF3D7_0632300	rifin (RIF)	-0.818965	0.00499298	0.0452906
PF3D7_1104900	calcium/calmodulin-dependent protein kinase, putative	-0.372155	0.00506357	0.0456048
PF3D7_1476300	Plasmodium exported protein (PHISTb), unknown function	-0.375862	0.0050672	0.0456048
PF3D7_0200100	erythrocyte membrane protein 1, PfEMP1 (VAR)	-0.838206	0.00532719	0.0466686
PF3D7_1401200	Plasmodium exported protein, unknown function	-0.375846	0.00555418	0.0476207
PF3D7_0909100	conserved Plasmodium membrane protein, unknown function	-0.621226	0.00569845	0.0486268
PF3D7_0820300	conserved Plasmodium protein, unknown function	-0.372934	0.00579839	0.049297
PF3D7_1449200	conserved Plasmodium protein, unknown function	-0.413632	0.0058865	0.049793
